# Supplementary material for: The Role of Medicago lupulina Interaction with Rhizophagus irregularis in the Determination of Root Metabolome at Early Stages of AM Symbiosis
Source: MDPI journal article supplement (doi:10.3390/plants11182338), 2022-09-07
Supplement: s1 [file s1]

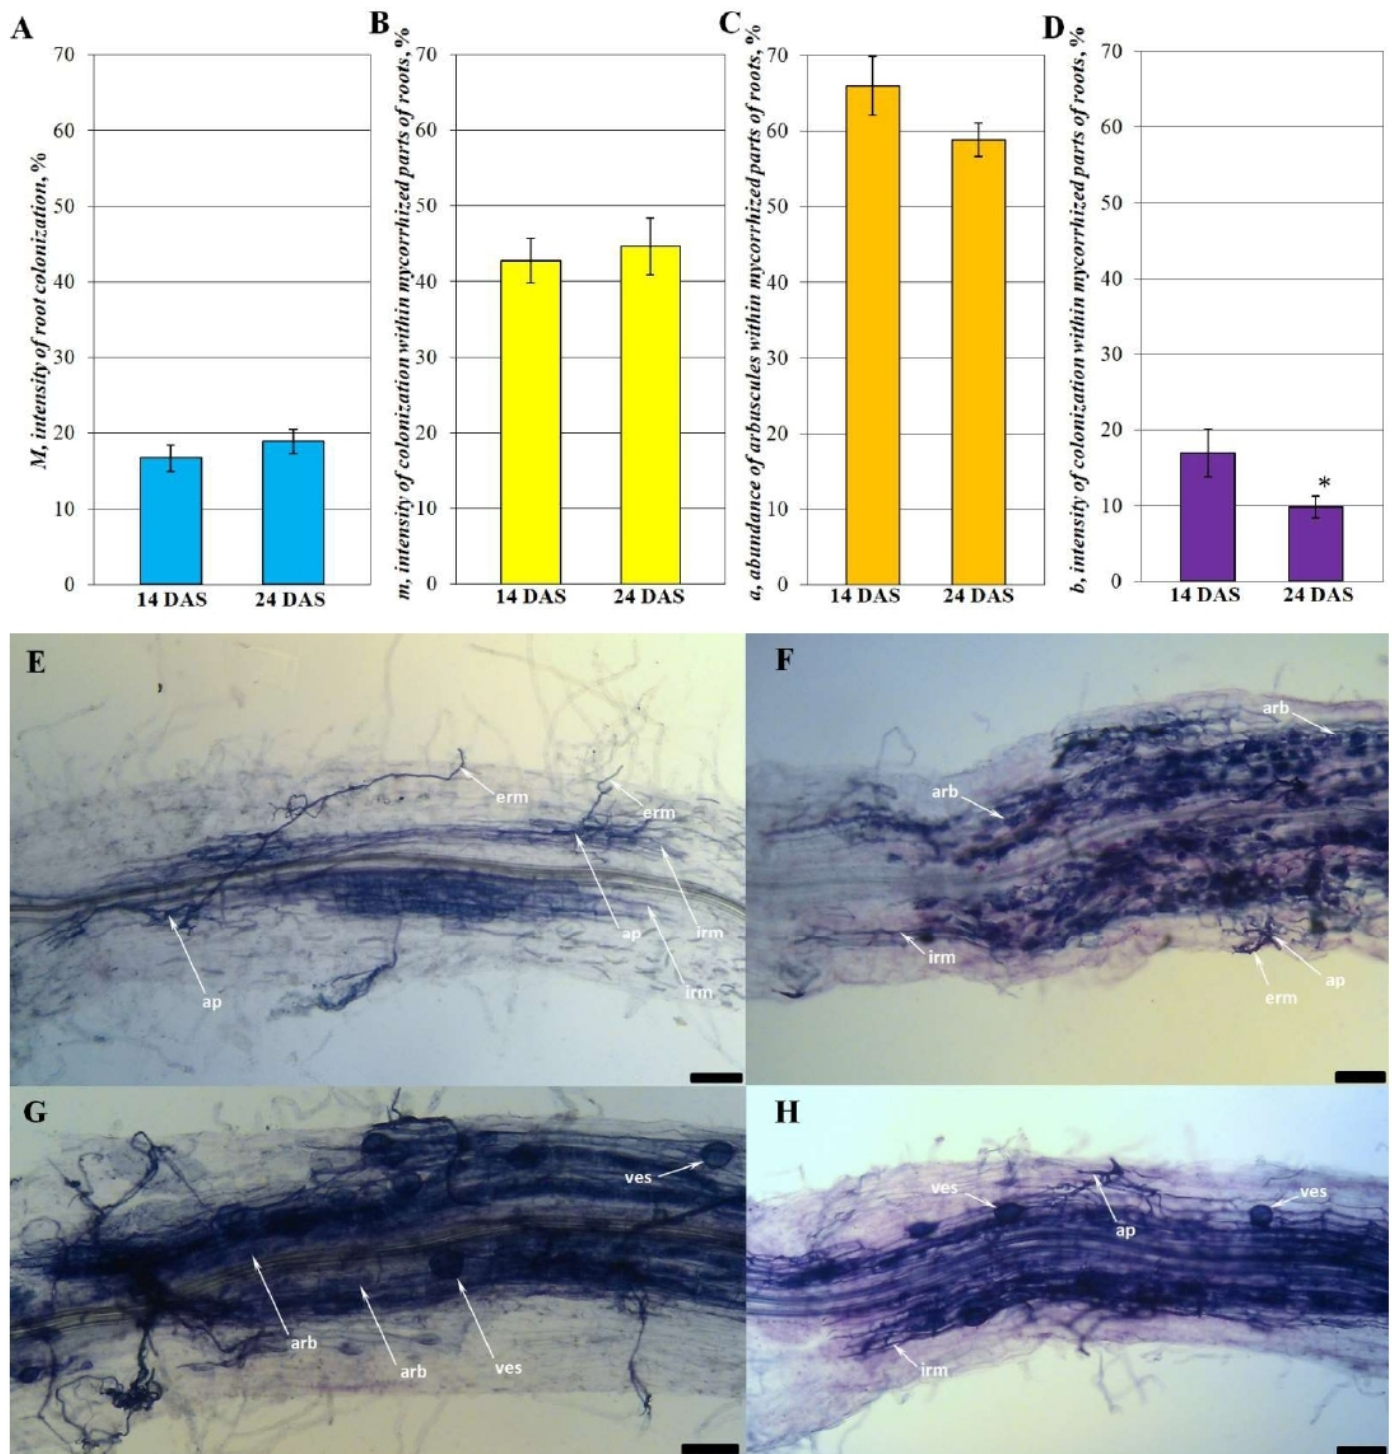

**Figure S1.** Mycorrhization parameters for *M. lupulina* roots infected by *R. irregularis*: **A.** *M* – the intensity of root cortex colonization; **B.** *m* – the intensity of colonization within individual mycorrhizal roots; **C.** *a* – the abundance of arbuscules in mycorrhized parts of roots; **D.** *b* – the abundance of vesicles in mycorrhized parts of roots; **E.** Appressoria and AM at 14 DAS; **F.** Arbuscules in AM at 24 DAS; **G.** Arbuscules and vesicles in AM at 14 DAS; **H.** Vesicles in AM at 24 DAS. “DAS” is the day after sowing and inoculation, “erm” – extraradical micelium, “irm” – intraradical micelium, “ap” – appressorium, “arb” – arbuscule, “ves” – vesicle. The asterisk indicates significant ( $P<0.05$ ) difference in *b*. The scale bar is 100  $\mu\text{m}$ .

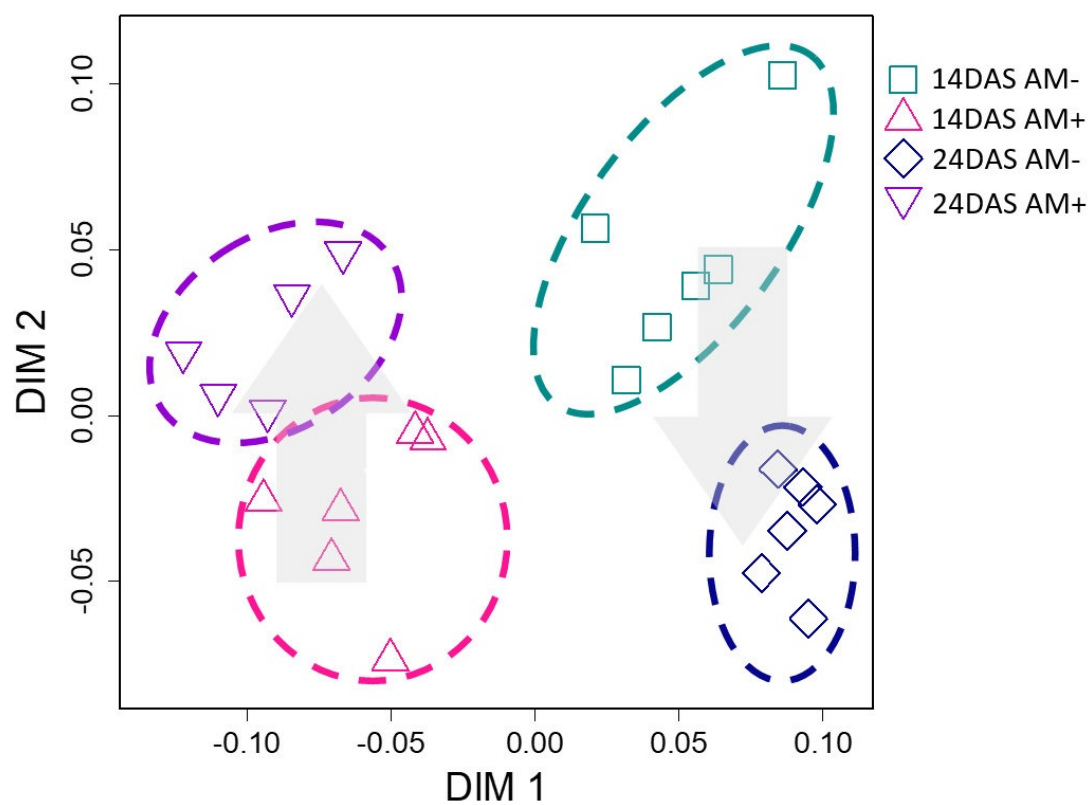

**Figure S2.** Representation metabolite profiles in low-dimensional spaces revealed from MDS, using  $1-r$  as a measure of distance, where  $r$  is Pearson's correlation coefficient.

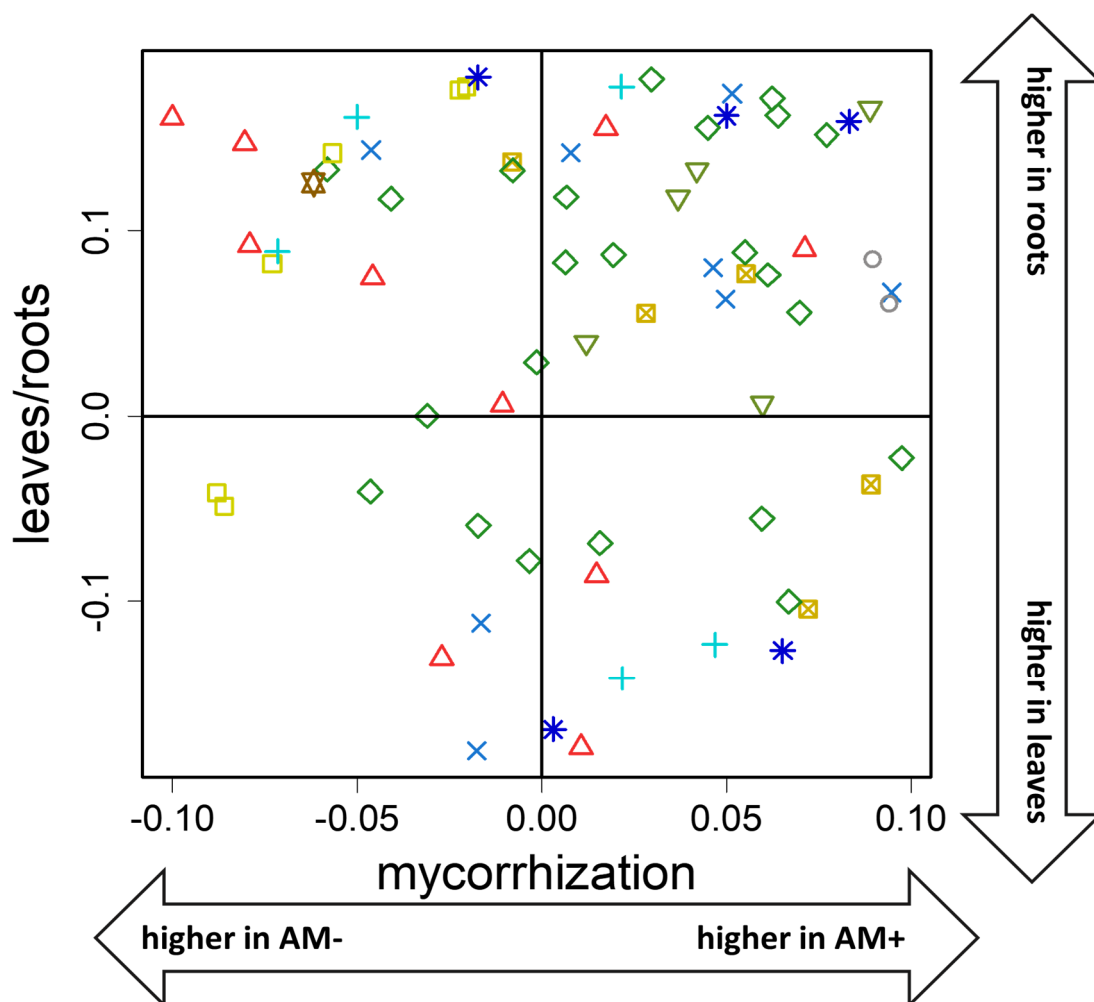

**Figure S3.** Comparison of mycorrhization effects and organ specificity. SUS plot in the space of the loadings from two OPLS-DA models for discrimination of mycorrhized (AM+) and nonmycorrhized (AM-) roots (abscissa) and roots/leaves (ordinate) at both time points. Symbols are the same as in Figure 5.

The following supporting information can be downloaded at: [www.mdpi.com/xxx/s1](http://www.mdpi.com/xxx/s1), **Table S1:** Peak areas normalized per internal standard.
