# Supplementary material for: The Role of Medicago lupulina Interaction with Rhizophagus irregularis in the Determination of Root Metabolome at Early Stages of AM Symbiosis
Source: Plants (Basel). 2022 Sep 7;11(18):2338. doi: 10.3390/plants11182338 (PMC9501341; doi:10.3390/plants11182338)
Supplement: Supplementary file 1 [file plants-11-02338-s001.zip › Supplementary Table S1.xlsx]

## Sheet: Data
Table S1. Peak areas normalized per internal standard.
ID	Timepoint	Mycorrhiza	class	2-Deoxyglucose	3-Deoxytetronic acid	Acetylserine	Aconitic acid	acylglycerol_RI=2813	Alanine	Allantoin	amine_RI=1530	Aminoadipic acid	Aminomalonic acid	AMP	Asparagine	Aspartic acid	b-Alanine	Cadaverine	Campesterol	Citric acid	complexsug_RI=2417	complexsug_RI=2611	complexsug_RI=2751	complexsug_RI=2760	complexsug_RI=2772	complexsug_RI=2783	complexsug_RI=2799	complexsug_RI=2809	complexsug_RI=2825	complexsug_RI=2833	complexsug_RI=2835	complexsug_RI=2838	complexsug_RI=2995	Cysteine	Erythronic acid	Ethanolamine	FA 12:0	FA 16:0	FA 18:0	FA 18:2	FA 18:3	FA 24:0	FAlc 12:0	FAlc 14:0	FAlc 16:0	Fructose	Fumaric acid	GABA	Galactono-1,4-lacton
AM+_14d-1	14	AM+	14d AM+	0.196877	0.00128188	0.00881986	0.0132787	0.0078111	0.228472	0.306315	0.00471111	0.0128279	0.0102236	0.000709553	11.1358	0.33358	0.0365723	0.165828	0.037415	1.71377	0.212835	0.0435646	0.00412237	0.11512	0.0912408	0.0116257	0.484748	0.00329525	0.0321925	0.00749746	0.0317907	0.000231668	0.00961802	0.00416146	0.00721552	0.198082	0.00524934	0.321647	2.00088	0.0727111	0.0796409	0.0149374	0.00793002	0.0161332	0.0417918	6.34036	0.0180086	0.348922	0.0259834
AM+_14d-2	14	AM+	14d AM+	0.158769	0.000781309	0.0077343	0.011027	0.00680037	0.252532	0.421356	0.00486236	0.0118353	0.00813002	0.00139443	13.0637	0.330386	0.0350937	0.1587	0.0588539	1.67975	0.199372	0.0455722	0.00412422	0.133651	0.101277	0.0121243	0.553201	0.00434115	0.0403952	0.00882743	0.0417623	0.000319572	0.0156662	0.00219915	0.0080324	0.21151	0.00599532	0.316629	1.91977	0.0804522	0.0855676	0.0171395	0.00758494	0.0159758	0.0398986	6.79874	0.0178043	0.346883	0.0271325
AM+_14d-3	14	AM+	14d AM+	0.189491	0.00128775	0.00825421	0.0106603	0.0059672	0.176072	0.400212	0.041748	0.00987872	0.00554246	0.000537388	9.48221	0.245087	0.031817	0.00471379	0.021906	1.4306	0.196144	0.0452716	0.00277683	0.131644	0.124021	0.0267379	0.122876	0.00388463	0.0407817	0.0222069	0.0344852	0.000431915	0.0125542	0.00464788	0.00666885	0.32733	0.00506253	0.267953	1.36183	0.102219	0.0729749	0.0153464	0.00837594	0.0245082	0.0212136	6.69944	0.0269697	0.5364	0.0242138
AM+_14d-4	14	AM+	14d AM+	0.165437	0.00103995	0.00798904	0.00798014	0.00552202	0.187665	0.541019	0.0404434	0.0092725	0.00450462	0.000788442	10.6586	0.245985	0.0320238	0.00489689	0.0308343	1.43396	0.185665	0.0466845	0.00394084	0.14559	0.132398	0.0297937	0.138241	0.00509965	0.0481603	0.0250453	0.0428938	0.000552481	0.0169646	0.00277493	0.00609637	0.336058	0.00579831	0.269411	1.25107	0.105932	0.0752425	0.0168969	0.00791944	0.0237909	0.0212009	7.18695	0.0261061	0.541262	0.0247562
AM+_14d-5	14	AM+	14d AM+	0.223928	0.00181734	0.0104157	0.0143595	0.00830571	0.255489	0.301098	0.0968459	0.0106879	0.0180597	0.000110614	8.32042	0.36108	0.0483054	0.13221	0.012809	2.06864	0.221354	0.0376003	0.00366585	0.124362	0.106209	0.0156274	0.415872	0.00301232	0.0314693	0.00940323	0.0287833	0.00027093	0.00574408	0.00676622	0.00957811	0.316274	0.00412551	0.255727	1.77852	0.0924123	0.0692076	0.0119496	0.00455965	0.010249	0.00804841	6.90623	0.0243283	0.522774	0.0297985
AM+_14d-6	14	AM+	14d AM+	0.211852	0.0012058	0.0126209	0.0162275	0.0083542	0.395783	0.472175	0.118822	0.0107467	0.0152436	0.000206611	13.5081	0.480802	0.0499102	0.146933	0.0151326	2.27213	0.173765	0.0412296	0.0138393	0.158984	0.0597733	0.0137248	0.404823	0.00387279	0.0526182	0.0117272	0.0322865	0.0003244	0.00615105	0.00305761	0.0113229	0.493727	0.00578153	0.268008	2.0314	0.11006	0.0889635	0.0120873	0.00598019	0.012699	0.00925417	7.60533	0.0278188	0.690609	0.0288198
AM-_14d-1	14	AM-	14d AM-	0.234886	0.000782401	0.00741201	0.00645564	0	0.189091	0.347358	0.126098	0.00844093	0.00625829	0.000241668	10.7248	0.219996	0.0310374	0.00522551	0	3.68942	0.200218	0.0289193	0.00421013	0.0961918	0.0450467	0.0134944	0.0379109	0	0.028032	0.00793344	0.0160426	0.000238842	0.00595575	0.00057545	0.0382196	0.251761	0.00678956	0.269292	1.15147	0.112364	0.0805745	0.00788594	0.0135486	0.0447938	0.0242148	6.27431	0.0355194	0.531538	0.0404027
AM-_14d-2	14	AM-	14d AM-	0.187979	0.000563571	0.00754131	0.00439083	0	0.197691	0.521337	0.108897	0.00467789	0.00416879	0.000551883	14.1202	0.231625	0.0273596	0.0051165	0	3.73506	0.201544	0.0393192	0.00465663	0.146282	0.0581567	0.0146942	0.0592204	0	0.0497015	0.0148459	0.0285363	0.0004538	0.0121464	0.00308593	0.0410035	0.269452	0.00693067	0.285206	1.37656	0.152569	0.111461	0.0160774	0.0128707	0.0451726	0.0261837	6.26231	0.0308766	0.529546	0.037642
AM-_14d-3	14	AM-	14d AM-	0.117308	0.000848239	0.00792915	0.00490323	0	0.149441	0.533683	0.00799121	0.00952016	0.00340247	0.000137029	16.4501	0.23421	0.0173695	0.182705	0	2.959	0.221827	0.0281521	0.00411747	0.0961491	0.0525949	0.00757658	0.0406926	0	0.0313894	0.00532661	0.0282788	0.000197997	0.0129179	0.000263817	0.0169117	0.182036	0.00447423	0.259072	1.12535	0.0889777	0.0837066	0.0126675	0.00450815	0.0447536	0.0777312	4.56451	0.0207206	0.273059	0.0533445
AM-_14d-4	14	AM-	14d AM-	0.129811	0.0041442	0.00886688	0.00236147	0	0.455691	0.401854	0.0155997	0.00377883	0.00903301	0	26.0666	0.590013	0.0144922	0.276374	0	3.72883	0.177852	0.0658298	0.0114572	0.31101	0.152192	0.0254725	0.15981	0	0.119451	0.00826178	0.0217408	0.000232352	0.026885	0.00912525	0.0403045	0.593794	0.00496651	0.336658	2.00104	0.187723	0.161388	0.0185588	0.02073	0.0694925	0.0842122	6.0657	0.0439235	0.674742	0.0531428
AM-_14d-5	14	AM-	14d AM-	0.252283	0.000700764	0.00808051	0.00434305	0	0.175129	0.184487	0.0029169	0.0112009	0.0139597	0	9.13817	0.237533	0.023187	0.081153	0	4.86637	0.261677	0.0209041	0.0037527	0.0847538	0.0383934	0.00865004	0.02653	0	0.0218738	0.00500361	0.0130986	0.00013302	0.00689993	0.00178411	0.0270335	0.17117	0.00452068	0.276366	1.35083	0.103989	0.0911703	0.00789074	0.00428712	0.00614822	0.00887131	5.53666	0.0300896	0.29829	0.0347402
AM-_14d-6	14	AM-	14d AM-	0.247766	0.000827469	0.0082209	0.00433339	0	0.172338	0.178089	0.00287794	0.0109752	0.0149418	0	9.11213	0.241698	0.0254407	0.083402	0	5.0572	0.267604	0.0215242	0.0025727	0.0836483	0.0457444	0.00833722	0.024143	0	0.0203444	0.00484857	0.0136034	0.000131234	0.00717789	0.0020547	0.0274697	0.168776	0.00472505	0.285033	1.42181	0.107533	0.0990012	0.00752426	0.00411977	0.00611321	0.00915623	5.74929	0.030511	0.308051	0.0351826
AM+_24d-1	24	AM+	24d AM+	0.260624	0.00143755	0.0127205	0.0185676	0	0.204002	0.611065	0.0153527	0.0149103	0.00846214	0.00236802	18.0455	0.364388	0.0637186	0.318483	0.0818957	2.00633	0.258595	0.0545664	0.00979539	0.260814	0.245799	0.019277	0.942217	0	0.0641316	0.0146068	0.0683608	0.000427314	0.0101235	0.00464182	0.0132083	0.321026	0.00706792	0.332059	2.72467	0.110839	0.0993217	0.0232056	0.0218755	0.176865	0.111441	7.66666	0.0305846	0.481165	0.0588047
AM+_24d-2	24	AM+	24d AM+	0.250462	0.00226281	0.010337	0.00929956	0	0.210978	0.62617	0.0147715	0.00891997	0.00462714	0.00050118	19.7009	0.391061	0.0505261	0.329594	0.0536208	2.10243	0.219776	0.0524944	0.00511217	0.223743	0.154515	0.00525507	0.781924	0	0.0620079	0.00939706	0.0526194	0.000361598	0.00484411	0.00417251	0.0133742	0.343074	0.00686291	0.330167	2.53494	0.125247	0.108108	0.0179603	0.0197735	0.163531	0.105387	7.86415	0.027697	0.509138	0.0577837
AM+_24d-3	24	AM+	24d AM+	0.343772	0.00139212	0.0159304	0.015508	0	0.234355	0.85849	3.16199	0.010815	0.00724482	0.000961508	21.4722	0.402301	0.071768	0.0768146	0.0538354	1.6807	0.332142	0.0716905	0.0106575	0.165583	0.130459	0.0277509	0.271618	0	0.0679845	0.0314962	0.0516258	0.000866346	0.00582751	0.0091768	0.0135631	0.505575	0.00634661	0.356756	2.23613	0.13582	0.116649	0.0212607	0.0295194	0.193017	0.120551	9.73046	0.0384888	0.790201	0.0516963
AM+_24d-4	24	AM+	24d AM+	0.357286	0.00213945	0.0166697	0.0193069	0	0.261562	0.863733	3.24881	0.0108339	0.00873777	0.000690208	22.9143	0.433918	0.0765978	0.0806163	0.0509943	1.72038	0.344277	0.0750273	0.0113845	0.169598	0.126577	0.0278849	0.27156	0	0.0689957	0.0310848	0.0523599	0.000805968	0.00376207	0.00969094	0.0171238	0.541565	0.0065066	0.362641	2.40692	0.136321	0.125819	0.022005	0.0281814	0.193453	0.124539	9.92081	0.0414166	0.820748	0.0559042
AM+_24d-5	24	AM+	24d AM+	0.224234	0.00519088	0.0112332	0.0207385	0	0.224528	0.669599	0.0130024	0.00610354	0.00822241	0.000774254	19.8472	0.418604	0.0540658	0.214621	0.0395051	1.84283	0.212241	0.0667215	0.00579425	0.207822	0.0746326	0.0221667	0.36483	0	0.0815877	0.0115157	0.0403436	0.000523273	0.00310033	0.0167527	0.0374315	0.490453	0.00440785	0.354244	2.40987	0.1493	0.121569	0.0195787	0.0303155	0.164363	0.0874283	8.5848	0.026831	0.639825	0.0616792
AM-_24d-1	24	AM-	24d AM-	0.0774378	0.000456208	0.00594775	0.00436454	0.0178894	0.083101	0.186132	0.00396807	0.00393968	0.0179042	0	8.46804	0.0966958	0.00626474	0.0679802	0	3.31793	0.507273	0.0179379	0.0050596	0.0890162	0.0653136	0.0110521	0.0340233	0.00583784	0.0200426	0.00507718	0.0199643	0.000164516	0.0172409	0.000746953	0.0142596	0.0540079	0.00527363	0.31985	1.76758	0.150887	0.126471	0.0134032	0.00366922	0.0211693	0.0361222	2.40917	0.0253935	0.191125	0.0200773
AM-_24d-2	24	AM-	24d AM-	0.0766246	0.000555961	0.00565846	0.003443	0.0120879	0.0850921	0.163137	0.00378393	0.00426953	0.0194067	0	7.69173	0.0990345	0.00631222	0.0679757	0	3.26987	0.480105	0.0153227	0.00470147	0.0753536	0.0495129	0.00798002	0.0297576	0.00438462	0.0163336	0.00325858	0.0150934	0.000121225	0.0105784	0.000561692	0.0149724	0.0569897	0.00500076	0.340039	1.66082	0.183938	0.144531	0.012367	0.00397368	0.020375	0.0348071	2.40973	0.0276857	0.195725	0.021394
AM-_24d-3	24	AM-	24d AM-	0.0206153	0	0.0036571	0.00254467	0	0.134896	0.149024	0.00374989	0.00396873	0.0115716	0	8.96137	0.146635	0.00825632	0.0543643	0	3.07426	0.337941	0.00919359	0.00139397	0.033886	0.0105829	0.00166065	0.0118051	0	0.00934058	0	0.00615899	5.29e-05	0.00637037	0.0003757	0.00100759	0.0353446	0.00323649	0.253081	1.15361	0.155867	0.109696	0.00970966	0.00537154	0.00850261	0.015196	0.522314	0.0120385	0.297167	0.0192231
AM-_24d-4	24	AM-	24d AM-	0.0220165	0	0.00412036	0.00218676	0	0.135024	0.177193	0.0041856	0.0051577	0.0159569	0	11.1978	0.147441	0.0106066	0.0553999	0	3.2299	0.347496	0.00907574	0.00138412	0.0357645	0.012884	0.00237997	0.0119977	0	0.00967615	0	0.0057421	5.82e-05	0.00769342	0.000188751	0.000809575	0.0363159	0.00305676	0.239388	1.09667	0.137285	0.0995445	0.00809456	0.00581999	0.00824608	0.0156579	0.518319	0.011736	0.301634	0.0213102
AM-_24d-5	24	AM-	24d AM-	0.0149593	0	0.00235443	0.00742434	0	0.0516325	0.473369	0.0719563	0.00409096	0.00450179	0	27.7015	0.177864	0.00221242	0.140949	0	4.32496	0.600752	0.0279318	0.00561216	0.0876027	0.014857	0.00766955	0.0452419	0	0.0319579	0	0.00913038	0.000106926	0.0196295	0.00140084	0.00517282	0.0704615	0.00792957	0.353141	0.736624	0.155168	0.133364	0.0160422	0.0190603	0.0867323	0.0717495	0.475211	0.0089253	0.197237	0.0568265
AM-_24d-6	24	AM-	24d AM-	0.0176348	0.000475928	0.00429985	0.00387811	0.0113051	0.0650823	0.297862	0.072443	0.00759411	0.00927156	0	18.9758	0.15842	0.00724601	0.140408	0	4.06234	0.771359	0.0141335	0.00189135	0.0524538	0.0335983	0.00591041	0.0306099	0.00642497	0.0124755	0.00194283	0.0111246	8.64e-05	0.0165299	0.000386164	0.00221705	0.0568797	0.00784315	0.370779	1.55673	0.188845	0.14319	0.0179836	0.0183725	0.0899554	0.0727091	0.44887	0.0118273	0.174412	0.0755207
ni - not identified
RI - retention index
FA - fatty acid
FAlc - fatty acohol
MG - monoacylglycerol
hexalc - hexose alcohol
pentalc - pentose alcohol
hexacid - hexose acid
pentacid - pentose acid
[truncated: 270 more columns]

## Sheet: OPLS-DA 14d AM- VS AM+
	p1	vip
2-Deoxyglucose	-0.00706692	0.125098				R2X	R2X(cum)	R2Y	R2Y(cum)	Q2	Q2(cum)	Signif.
3-Deoxytetronic acid	0.0137332	0.243106			p1	0.286	0.286	0.962	0.962	0.87	0.87	R1
Acetylserine	0.00816685	0.14457			o1	0.195	0.481	0.0332	0.0332	0.0711	0.0711	R1
Aconitic acid	0.0764967	1.35414			sum	NA	0.481	NA	0.995	NA	0.942	NA
acylglycerol_RI=2813	0.104762	1.85449
Alanine	0.00947339	0.167698
Allantoin	0.0127593	0.225865
amine_RI=1530	0.0182989	0.323927
Aminoadipic acid	0.0288466	0.510643
Aminomalonic acid	0.0102058	0.180662
AMP	0.0636339	1.12645
Asparagine	-0.0783053	1.38616
Aspartic acid	0.0172323	0.305046
b-Alanine	0.0505095	0.89412
Cadaverine	-0.00311249	0.0550972
Campesterol	0.100226	1.7742
Citric acid	-0.0824232	1.45905
complexsug_RI=2417	-0.0271509	0.480625
complexsug_RI=2611	0.0770036	1.36312
complexsug_RI=2751	-0.0170165	0.301226
complexsug_RI=2760	-0.00603526	0.106836
complexsug_RI=2772	0.0766051	1.35606
complexsug_RI=2783	0.0391215	0.692528
complexsug_RI=2799	0.0928571	1.64376
complexsug_RI=2809	0.104153	1.84372
complexsug_RI=2825	-0.00870758	0.154141
complexsug_RI=2833	0.0491383	0.869845
complexsug_RI=2835	0.0714122	1.26414
complexsug_RI=2838	0.0471732	0.835059
complexsug_RI=2995	-0.022796	0.403535
Cysteine	0.0443866	0.785732
Erythronic acid	-0.0965074	1.70837
Ethanolamine	0.017648	0.312405
FA-12:0	-0.0166454	0.294657
FA 16:0	-0.0246965	0.437178
FA 18:0	0.02462	0.435823
FA 18:2	-0.0741924	1.31335
FA 18:3	-0.082718	1.46427
FA 24:0	0.0441387	0.781343
FAlc 12:0	-0.0381293	0.674965
FAlc 14:0	-0.0419254	0.742163
FAlc 16:0	-0.0324797	0.574955
Fructose	0.0199201	0.352625
Fumaric acid	-0.0641771	1.13606
GABA	0.0114612	0.202887
Galactono-1,4-lacton	-0.0834482	1.4772
Gluconate-1,5-lactone	-0.0590376	1.04508
Gluconic acid	0.0131331	0.232483
Glucosamine	0.0281077	0.497563
Glucose	0.00295745	0.0523528
Glutamic acid	-0.0448993	0.794808
Glutamine	0.0123351	0.218356
Glutamylleucine	0.0432119	0.764937
Glutamylvaline	0.0557017	0.986032
Glyceric acid	-0.045491	0.805282
Glycerol	-0.0837908	1.48326
Glycine	0.0616607	1.09152
hexacid_RI=1784	0.0652938	1.15583
hexacid_RI=1980	0.00688968	0.121961
hexacid_RI=2018	0.0147258	0.260676
hexacid_RI=2044	-0.0153111	0.271037
hexalc_RI=1722	-0.0518719	0.918236
hexalc_RI=1921	0.0345041	0.610791
hexalc_RI=1976	-0.0171396	0.303405
hexalc_RI=1992	-0.0745678	1.32
hexose_RI=1732	0.0624469	1.10543
hexose_RI=1738	-0.0206688	0.365879
hexose_RI=1797	0.0160918	0.284857
hexose_RI=1824	-0.043098	0.76292
hexose_RI=1854	0.0237429	0.420296
hexose_RI=1882	-0.00329599	0.0583455
hexose_RI=1888	-0.0367826	0.651126
hexose_RI=1919	-0.0252993	0.447849
hexose_RI=1923	-0.00238441	0.0422089
hexose_RI=1928	-0.0234832	0.415699
hexose_RI=1956	0.0144338	0.255508
hexose-P_RI=2253	0.0259244	0.458913
hexose-P_RI=2273	0.0880552	1.55875
hexose-P_RI=2379	0.0627613	1.111
hexose-P_RI=2414	0.0230812	0.408583
hexose-P_RI=2435	0.0427625	0.756981
hexosesamine_RI=1972	0.0776965	1.37538
Histidin	0.0859379	1.52127
Homoserine	-0.00320437	0.0567238
inositol_RI=2185	-0.0547756	0.969636
Isoleucine	0.0135303	0.239514
Lactic acid	0.0559247	0.989979
Leucine	0.0579806	1.02637
Lysine	0.0840246	1.4874
Lyxose	-0.0422293	0.747543
Malic acid	-0.0932971	1.65154
Malonic acid	0.0579358	1.02558
Methionine	0.0389692	0.689833
Methyl phosphate	0.0841823	1.49019
MG(16:0/0:0/0:0)	-0.0268038	0.47448
myo-Inositol	-0.00606748	0.107406
myo-Inositol-2-P	0.0902975	1.59845
ni_RI=17.19	-0.0673292	1.19186
ni_RI=1241	0.000482887	0.00854807
ni_RI=1257	-0.0948126	1.67837
ni_RI=1330	-0.0881915	1.56116
ni_RI=1339	-0.084097	1.48868
ni_RI=1344	-0.0333456	0.590284
ni_RI=1350	-0.0792176	1.40231
ni_RI=1354	0.00510621	0.09039
ni_RI=1356	-0.0563221	0.997013
ni_RI=1391	-0.101642	1.79926
ni_RI=1421	-0.0699164	1.23766
ni_RI=1422	0.0264087	0.467487
ni_RI=1423	0.00990742	0.175381
ni_RI=1424	-0.0426865	0.755636
ni_RI=1430	-0.0485004	0.858553
ni_RI=1440	0.0369644	0.654344
ni_RI=1445	0.0928629	1.64386
ni_RI=1454	-0.0690016	1.22146
ni_RI=1456	-0.048454	0.857731
ni_RI=1466	0.0353254	0.62533
ni_RI=1474	0.0802515	1.42061
ni_RI=1482	-0.0804218	1.42363
ni_RI=1490	-0.0623684	1.10404
ni_RI=1498	-0.00373453	0.0661087
ni_RI=1504	-0.0898303	1.59018
ni_RI=1521	-0.0296629	0.525092
ni_RI=1551	-0.0757611	1.34112
ni_RI=1552	-0.0495083	0.876396
ni_RI=1564	0.00720244	0.127497
ni_RI=1569	-0.0169295	0.299686
ni_RI=1579	-0.0705859	1.24951
ni_RI=1584	-0.0746566	1.32157
ni_RI=1587	-0.0362372	0.64147
ni_RI=1591	0.0364222	0.644745
ni_RI=1594	-0.0559716	0.990809
ni_RI=1598	0.0229406	0.406094
ni_RI=1600	0.0661052	1.17019
ni_RI=1608	-0.0779382	1.37966
ni_RI=1624	0.0737968	1.30635
ni_RI=1651	-0.031727	0.561632
ni_RI=1655	-0.0177423	0.314074
ni_RI=1657	-0.0496816	0.879464
ni_RI=1658	-0.0194124	0.343638
ni_RI=1667	-0.0763323	1.35123
ni_RI=1668	0.00338299	0.0598857
ni_RI=1676	0.00824634	0.145977
ni_RI=1677	0.053563	0.948172
ni_RI=1681	0.0181229	0.320811
ni_RI=1683	-0.00349811	0.0619234
ni_RI=1709	0.0882564	1.56231
ni_RI=1711	0.0189044	0.334645
ni_RI=1714	0.0381838	0.675929
ni_RI=1722	-0.00106147	0.0187901
ni_RI=1728	0.0266617	0.471965
ni_RI=1746	0.045333	0.802484
ni_RI=1768	-0.0591796	1.0476
ni_RI=1776	0.0345152	0.610987
ni_RI=1780	-0.0873746	1.5467
ni_RI=1787	0.104488	1.84965
ni_RI=1803	-0.0558624	0.988876
ni_RI=1816	0.087028	1.54057
ni_RI=1827	-0.0863705	1.52893
ni_RI=1831	-0.0239263	0.423543
ni_RI=1869	0.043509	0.770196
ni_RI=1873	-0.0721353	1.27694
ni_RI=1904	0.0885833	1.5681
ni_RI=1906	0.00295645	0.0523351
ni_RI=1930	-0.0436078	0.771944
ni_RI=1935	-0.0589533	1.04359
ni_RI=1953	0.0462662	0.819003
ni_RI=1957	-0.0573934	1.01598
ni_RI=1964	0.082811	1.46592
ni_RI=1968	-0.0683267	1.20952
ni_RI=1972	-0.0322032	0.570061
ni_RI=1978	-0.083352	1.4755
ni_RI=1992	-0.0841335	1.48933
ni_RI=2019	0.0161038	0.285069
ni_RI=2021	0.058816	1.04116
ni_RI=2024	0.0627702	1.11116
ni_RI=2028	-0.0236658	0.418932
ni_RI=2032	-0.101696	1.80022
ni_RI=2036	0.0477878	0.845939
ni_RI=2041	-0.055664	0.985364
ni_RI=2064	0.00187008	0.0331041
ni_RI=2067	-0.040457	0.71617
ni_RI=2079	0.0471228	0.834168
ni_RI=2097	0.0449773	0.796189
ni_RI=2103	0.0738412	1.30714
ni_RI=2110	-0.0483022	0.855045
ni_RI=2113	0.030869	0.546442
ni_RI=2123	0.0791964	1.40193
ni_RI=2124	0.0308166	0.545515
ni_RI=2128	0.0667604	1.18179
ni_RI=2132	0.0385634	0.682649
ni_RI=2153	-0.0793078	1.40391
ni_RI=2156	0.0388254	0.687288
ni_RI=2162	-0.0285494	0.505381
ni_RI=2169	0.102818	1.82008
ni_RI=2177	0.0867994	1.53652
ni_RI=2188	0.0389754	0.689942
ni_RI=2193	0.0395882	0.700791
ni_RI=2203	0.0641105	1.13488
ni_RI=2206	-0.0170883	0.302496
ni_RI=2214	0.0818476	1.44887
ni_RI=2225	0.0626738	1.10945
ni_RI=2227	-0.034965	0.618951
ni_RI=2229	0.0347665	0.615436
ni_RI=2234	0.1026	1.81623
ni_RI=2236	-0.0158022	0.279731
ni_RI=2238	-0.028905	0.511675
ni_RI=2240	0.0621735	1.10059
ni_RI=2247	0.0437119	0.773788
ni_RI=2252	0.0491141	0.869418
ni_RI=2262	-0.0108772	0.192549
ni_RI=2281	-0.0339258	0.600554
ni_RI=2287	0.101561	1.79783
ni_RI=2313	-0.0452285	0.800634
ni_RI=2334	-0.072608	1.28531
ni_RI=2339	0.0918635	1.62617
ni_RI=2348	-0.0815104	1.4429
ni_RI=2394	0.0803516	1.42238
ni_RI=2402	0.0596899	1.05663
ni_RI=2443	-0.0509197	0.90138
ni_RI=2454	-0.0694432	1.22928
ni_RI=2463	-0.065845	1.16559
ni_RI=2476	0.021032	0.372308
ni_RI=2501	0.0422473	0.747862
ni_RI=2507	-0.0499286	0.883835
ni_RI=2536	0.0758273	1.34229
ni_RI=2547	0.0529608	0.937512
ni_RI=2567	-0.00838233	0.148384
ni_RI=2575	0.0456095	0.807378
ni_RI=2577	0.101991	1.80544
ni_RI=2585	0.0744027	1.31708
ni_RI=2593	-0.0535979	0.948789
ni_RI=2607	0.0944549	1.67204
ni_RI=2624	0.105218	1.86257
ni_RI=2627	0.0634412	1.12303
ni_RI=2635	0.0616236	1.09086
ni_RI=2639	-0.0116688	0.206562
ni_RI=2647	0.023807	0.421432
ni_RI=2648	0.0452897	0.801718
ni_RI=2651	0.0829547	1.46846
ni_RI=2658	-0.00844602	0.149511
ni_RI=2662	0.0971434	1.71963
ni_RI=2679	0.0544228	0.963391
ni_RI=2685	0.0609437	1.07883
ni_RI=2728	0.0534273	0.945769
ni_RI=2730	-0.0539222	0.95453
ni_RI=2745	0.0443397	0.7849
ni_RI=2746	0.0569568	1.00825
ni_RI=2747	-0.0169662	0.300335
ni_RI=2749	0.0854382	1.51243
ni_RI=2773	-0.0626663	1.10932
ni_RI=2817	0.0138462	0.245106
ni_RI=2821	-0.0137312	0.24307
ni_RI=2828	0.0809806	1.43352
ni_RI=2831	-0.00561644	0.0994221
ni_RI=2837	0.00822318	0.145567
ni_RI=2838	-0.0379742	0.672218
ni_RI=2839	0.0669285	1.18477
ni_RI=2840	-0.013125	0.232339
ni_RI=2850	0.0954894	1.69035
ni_RI=2862	0.0833635	1.4757
ni_RI=2903	0.053112	0.940189
ni_RI=2974	0.0434712	0.769527
ni_RI=3041	-0.054366	0.962386
ni_RI=3155	-0.0521767	0.923631
ni_RI=3175	0.0523791	0.927215
ni_RI=3207	0.0930696	1.64752
ni_RI=3248	0.0984636	1.743
ni_RI=3352	0.0165677	0.293282
ni_RI=3392	0.0152161	0.269354
ni_RI=1029	-0.059765	1.05796
ni_RI=1035	-0.0735373	1.30176
ni_RI=1045	-0.061375	1.08646
ni_RI=3520	-0.0080088	0.141772
ni_RI=3545	-0.0229607	0.406451
ni_RI=1151	0.0413914	0.732711
ni_RI=1167	-0.055952	0.990462
ni_RI=1186	-0.0501736	0.888172
ni_RI=1187	0.0283255	0.501417
Ononitol	0.0137084	0.242666
Ornithine	0.0923333	1.63448
Oxalate	0.000942001	0.0166753
Oxoproline	0.0285983	0.506247
pentalc_RI=1748	-0.0710316	1.2574
pentalc_RI=1753	0.0287216	0.508429
pentose_RI=1664	0.0113445	0.200821
pentose_RI=1671	-0.0154305	0.273151
pentose_RI=1707	0.043145	0.763753
pentose_RI=1797	-0.0426327	0.754684
Phenylalanine	-0.0521061	0.922382
Phosphoric acid	0.101947	1.80467
polyol_RI=1291	-0.0284924	0.504372
Proline	-0.079653	1.41002
Putrescine	0.0271014	0.479749
Ribonic acid	-0.0939113	1.66242
Serine	0.0475563	0.841841
Squalene	-0.00970564	0.171809
sterol_RI=3158	0.051105	0.904661
sterol_RI=3277	0.0673654	1.1925
sterol_RI=3299	0.0592172	1.04826
sterol_RI=3310	0.060601	1.07276
sterol_RI=3386	-0.0306885	0.543248
sterol_RI=3398	0.0565722	1.00144
Stigmasterol	0.0525302	0.92989
Suberylglycine	-0.0646532	1.14449
Succinic acid	-0.0832399	1.47351
Sucrose	-0.0121581	0.215223
Threonic acid	-0.00850211	0.150504
Threonine	-0.00916755	0.162284
Tryptophan	0.0763193	1.351
Tyrosine	0.102292	1.81077
Urea	0.0418738	0.74125
Uridine	0.0705634	1.24911
Valine	-0.0404966	0.71687

## Sheet: OPLS-DA 24d AM- VS AM+
	p1	VIP
2-Deoxyglucose	0.0639571	1.13314						R2X	R2X(cum)	R2Y	R2Y(cum)	Q2	Q2(cum)	Signif.
3-Deoxytetronic acid	0.0580558	1.02859					p1	0.451	0.451	0.982	0.982	0.95	0.95	R1
Acetylserine	0.0217761	0.385812					o1	0.125	0.577	0.0159	0.0159	0.0184	0.0184	R1
Aconitic acid	0.0674721	1.19542					sum	NA	0.577	NA	0.998	NA	0.968	NA
acylglycerol_RI=2813	-0.0482902	0.855571
Alanine	0.000842143	0.0149205
Allantoin	0.0420728	0.745415
amine_RI=1530	0.0323228	0.572671
Aminoadipic acid	-0.022775	0.40351
Aminomalonic acid	-0.0671825	1.19029
AMP	0.0821928	1.45623
Asparagine	-0.0473401	0.838737
Aspartic acid	0.021947	0.388841
b-Alanine	0.0634041	1.12335
Cadaverine	-0.01737	0.307749
Campesterol	0.0833415	1.47658
Citric acid	-0.0817181	1.44782
complexsug_RI=2417	-0.0810563	1.4361
complexsug_RI=2611	0.0785897	1.39239
complexsug_RI=2751	0.0162481	0.287872
complexsug_RI=2760	0.0528412	0.936202
complexsug_RI=2772	0.047207	0.836379
complexsug_RI=2783	0.0255859	0.453312
complexsug_RI=2799	0.0766948	1.35882
complexsug_RI=2809	-0.0481419	0.852943
complexsug_RI=2825	0.0763912	1.35344
complexsug_RI=2833	0.0619558	1.09769
complexsug_RI=2835	0.0633249	1.12194
complexsug_RI=2838	0.0711883	1.26126
complexsug_RI=2995	-0.0798741	1.41515
Cysteine	0.0759605	1.34581
Erythronic acid	0.0313782	0.555935
Ethanolamine	0.0811884	1.43844
FA 12:0	-0.0754329	1.33646
FA 16:0	-0.0787522	1.39527
FA 18:0	-0.032782	0.580806
FA 18:2	-0.0776131	1.37509
FA 18:3	-0.0791012	1.40146
FA 24:0	-0.0684429	1.21262
FAlc 12:0	0.026732	0.473618
FAlc 14:0	0.0565025	1.00107
FAlc 16:0	0.0278259	0.493
Fructose	0.0651295	1.15392
Fumaric acid	-0.0177507	0.314494
GABA	0.0126187	0.223569
Galactono-1,4-lacton	-0.0312079	0.552919
Gluconate-1,5-lactone	-0.0773947	1.37122
Gluconic acid	0.0550441	0.975231
Glucosamine	0.0225529	0.399575
Glucose	0.0744082	1.31831
Glutamic acid	-0.0272385	0.482592
Glutamine	0.0394276	0.69855
Glutamylleucine	0.020766	0.367916
Glutamylvaline	0.0349514	0.619243
Glyceric acid	0.0578111	1.02425
Glycerol	0.0745806	1.32136
Glycine	0.0316184	0.560191
hexacid_RI=1784	0.0529932	0.938895
hexacid_RI=1980	0.0240615	0.426304
hexacid_RI=2018	-0.0177535	0.314544
hexacid_RI=2044	-0.0101268	0.17942
hexalc_RI=1722	0.011942	0.21158
hexalc_RI=1921	0.0739777	1.31068
hexalc_RI=1976	0.0493812	0.8749
hexalc_RI=1992	0.06322	1.12008
hexose_RI=1732	0.0563984	0.999225
hexose_RI=1738	0.0508229	0.900442
hexose_RI=1797	-0.0668461	1.18433
hexose_RI=1824	-0.0109473	0.193956
hexose_RI=1854	0.0698094	1.23683
hexose_RI=1882	0.0703019	1.24556
hexose_RI=1888	0.068357	1.2111
hexose_RI=1919	0.070664	1.25197
hexose_RI=1923	0.0731834	1.29661
hexose_RI=1928	-0.0277636	0.491894
hexose_RI=1956	-0.0392467	0.695345
hexose-P_RI=2253	0.0719951	1.27555
hexose-P_RI=2273	0.0497706	0.881799
hexose-P_RI=2379	0.0796721	1.41157
hexose-P_RI=2414	0.0651966	1.15511
hexose-P_RI=2435	0.080684	1.4295
hexosesamine_RI=1972	0.0418224	0.740978
Histidin	0.0728556	1.2908
Homoserine	-0.0374163	0.662914
inositol_RI=2185	-0.0668366	1.18416
Isoleucine	-0.0127667	0.226191
Lactic acid	-0.0378678	0.670913
Leucine	-0.0135947	0.24086
Lysine	0.0530907	0.940621
Lyxose	0.0733973	1.3004
Malic acid	-0.0479009	0.848672
Malonic acid	0.0686801	1.21682
Methionine	0.0626012	1.10912
Methyl phosphate	0.0719972	1.27559
MG(16:0/0:0/0:0)	-0.0718227	1.2725
myo-Inositol	-0.0183635	0.32535
myo-Inositol-2-P	0.0752518	1.33326
ni_RI=17.19	-0.0786591	1.39362
ni_RI=1241	0.0585066	1.03658
ni_RI=1257	-0.074813	1.32548
ni_RI=1330	0.0583905	1.03452
ni_RI=1339	-0.0531772	0.942154
ni_RI=1344	0.0668073	1.18364
ni_RI=1350	-0.076493	1.35525
ni_RI=1354	0.054941	0.973404
ni_RI=1391	-0.0819848	1.45255
ni_RI=1421	-0.0198905	0.352405
ni_RI=1422	-0.0622229	1.10242
ni_RI=1423	0.0401144	0.710717
ni_RI=1424	0.053246	0.943372
ni_RI=1430	0.0648234	1.14849
ni_RI=1440	-0.0562721	0.996987
ni_RI=1445	0.0716142	1.26881
ni_RI=1454	0.053702	0.951451
ni_RI=1456	0.0667355	1.18237
ni_RI=1466	0.075978	1.34612
ni_RI=1474	0.0695405	1.23207
ni_RI=1482	-0.0473569	0.839034
ni_RI=1490	-0.0716586	1.26959
ni_RI=1498	0.0426383	0.755434
ni_RI=1504	-0.0664002	1.17643
ni_RI=1521	0.0447528	0.792896
ni_RI=1551	-0.0759948	1.34642
ni_RI=1552	-0.0758599	1.34403
ni_RI=1564	-0.0673702	1.19362
ni_RI=1569	0.0712	1.26147
ni_RI=1579	-0.0771617	1.36709
ni_RI=1584	-0.076105	1.34837
ni_RI=1587	-0.0761165	1.34858
ni_RI=1591	0.0304962	0.540309
ni_RI=1594	-0.0579767	1.02719
ni_RI=1598	0.0763663	1.353
ni_RI=1600	-0.0210018	0.372094
ni_RI=1608	0.0530018	0.939046
ni_RI=1624	0.0501479	0.888484
ni_RI=1651	0.0487473	0.863668
ni_RI=1655	0.00338401	0.0599554
ni_RI=1657	-0.0572982	1.01517
ni_RI=1658	0.036589	0.648258
ni_RI=1667	-0.0383101	0.678749
ni_RI=1668	0.0813804	1.44184
ni_RI=1676	-0.0169777	0.300798
ni_RI=1677	0.0113797	0.201617
ni_RI=1681	0.0186716	0.33081
ni_RI=1683	-0.0348978	0.618293
ni_RI=1709	0.00938457	0.166269
ni_RI=1711	0.0570745	1.0112
ni_RI=1714	0.000732527	0.0129784
ni_RI=1722	-0.0480723	0.851709
ni_RI=1728	-0.0518541	0.918712
ni_RI=1746	0.0391447	0.693537
ni_RI=1768	-0.0443689	0.786095
ni_RI=1776	0.0518007	0.917766
ni_RI=1780	0.0329641	0.584034
ni_RI=1787	0.0832986	1.47582
ni_RI=1803	-0.0436537	0.773424
ni_RI=1816	0.0565488	1.00189
ni_RI=1827	-0.0812473	1.43948
ni_RI=1831	0.0341091	0.604319
ni_RI=1869	0.0280943	0.497754
ni_RI=1873	0.0355929	0.630609
ni_RI=1904	0.0779931	1.38182
ni_RI=1906	0.0472887	0.837826
ni_RI=1930	-0.0759557	1.34573
ni_RI=1935	-0.0439877	0.779341
ni_RI=1953	0.0513123	0.909113
ni_RI=1957	-0.0649076	1.14999
ni_RI=1964	0.079408	1.40689
ni_RI=1968	-0.0756982	1.34116
ni_RI=1972	-0.00951881	0.168647
ni_RI=1978	-0.0508713	0.901299
ni_RI=1992	-0.052111	0.923263
ni_RI=2019	-0.0576296	1.02104
ni_RI=2021	0.032129	0.569238
ni_RI=2024	-0.0264735	0.469038
ni_RI=2028	-0.0657751	1.16536
ni_RI=2032	-0.0464787	0.823476
ni_RI=2036	0.043509	0.770861
ni_RI=2041	0.0435114	0.770903
ni_RI=2060	0.0833122	1.47606
ni_RI=2064	0.0553543	0.980726
ni_RI=2067	0.0394123	0.698278
ni_RI=2079	0.0637849	1.13009
ni_RI=2097	0.0436289	0.772984
ni_RI=2103	0.0741759	1.31419
ni_RI=2110	0.011418	0.202295
ni_RI=2113	0.0626284	1.1096
ni_RI=2123	0.0785439	1.39158
ni_RI=2124	-0.0522812	0.92628
ni_RI=2128	0.0793572	1.40599
ni_RI=2132	0.0188177	0.333399
ni_RI=2153	-0.0788666	1.3973
ni_RI=2156	-0.0685895	1.21522
ni_RI=2162	0.0477384	0.845793
ni_RI=2169	0.0836019	1.4812
ni_RI=2177	0.0504819	0.894401
ni_RI=2188	0.0799466	1.41643
ni_RI=2193	-0.0717521	1.27125
ni_RI=2203	0.0566005	1.00281
ni_RI=2206	0.0476353	0.843966
ni_RI=2214	0.0649564	1.15085
ni_RI=2225	0.0651173	1.1537
ni_RI=2227	0.052605	0.932017
ni_RI=2229	-0.0726565	1.28727
ni_RI=2234	0.0834162	1.47791
ni_RI=2236	0.0189393	0.335552
ni_RI=2238	-0.0678566	1.20223
ni_RI=2240	0.0615304	1.09015
ni_RI=2247	0.0807431	1.43055
ni_RI=2252	0.0352864	0.625178
ni_RI=2262	0.0667694	1.18297
ni_RI=2281	0.0533577	0.945352
ni_RI=2287	0.0817772	1.44887
ni_RI=2313	-0.0786122	1.39279
ni_RI=2334	0.030342	0.537576
ni_RI=2339	0.0695296	1.23187
ni_RI=2348	0.0136658	0.24212
ni_RI=2394	0.0508976	0.901766
ni_RI=2402	-0.0193704	0.34319
ni_RI=2443	0.060117	1.06511
ni_RI=2454	-0.076719	1.35925
ni_RI=2463	-0.0150085	0.265909
ni_RI=2476	-0.0103053	0.182581
ni_RI=2501	0.0614187	1.08817
ni_RI=2507	-0.023706	0.420005
ni_RI=2536	0.0698254	1.23711
ni_RI=2547	0.0484173	0.857822
ni_RI=2567	0.0192702	0.341415
ni_RI=2575	-0.0687496	1.21805
ni_RI=2585	0.0723951	1.28264
ni_RI=2593	-0.0553638	0.980895
ni_RI=2607	0.0553996	0.981529
ni_RI=2624	0.0446441	0.790972
ni_RI=2627	0.0747722	1.32476
ni_RI=2635	0.0172271	0.305218
ni_RI=2639	0.0312883	0.554343
ni_RI=2647	-0.0414416	0.734231
ni_RI=2648	0.0123095	0.218091
ni_RI=2651	-0.00157089	0.0278318
ni_RI=2658	-0.00446824	0.079165
ni_RI=2662	0.0798896	1.41543
ni_RI=2679	0.0628314	1.1132
ni_RI=2685	0.0358922	0.635911
ni_RI=2688	0.0820577	1.45384
ni_RI=2728	0.0499453	0.884894
ni_RI=2730	-0.0571865	1.01319
ni_RI=2745	0.0576593	1.02156
ni_RI=2746	0.0536561	0.950639
ni_RI=2747	-0.0507576	0.899286
ni_RI=2749	0.0733705	1.29992
ni_RI=2773	0.0832242	1.4745
ni_RI=2817	-0.00617557	0.109414
ni_RI=2821	-0.0327564	0.580354
ni_RI=2828	0.059453	1.05334
ni_RI=2831	0.0750424	1.32954
ni_RI=2837	0.063863	1.13148
ni_RI=2838	0.0338141	0.599092
ni_RI=2839	0.0716553	1.26954
ni_RI=2840	0.0434918	0.770555
ni_RI=2850	0.0399601	0.707984
ni_RI=2862	0.0574179	1.01729
ni_RI=2903	0.0694163	1.22987
ni_RI=2974	0.0400937	0.710351
ni_RI=3041	0.0821525	1.45552
ni_RI=3155	-0.073511	1.30241
ni_RI=3175	0.0589631	1.04466
ni_RI=3207	0.0400879	0.710249
ni_RI=3248	0.0831294	1.47282
ni_RI=3352	0.0697921	1.23653
ni_RI=3392	0.043693	0.774121
ni_RI=1029	0.0681095	1.20671
ni_RI=1035	-0.0167565	0.29688
ni_RI=1045	-0.0418182	0.740903
ni_RI=3520	0.0348149	0.616825
ni_RI=3545	0.0321221	0.569115
ni_RI=1151	-0.072685	1.28778
ni_RI=1167	-0.0185762	0.32912
ni_RI=1186	0.0489352	0.866997
ni_RI=1187	-0.0750744	1.33011
Ononitol	0.0610596	1.08181
Ornithine	0.0594431	1.05317
Oxalate	0.0593531	1.05157
Oxoproline	-0.0569443	1.0089
pentalc_RI=1748	-0.0127686	0.226224
pentalc_RI=1753	0.037233	0.659667
pentose_RI=1664	0.0612533	1.08524
pentose_RI=1671	0.0663535	1.1756
pentose_RI=1707	0.0480044	0.850506
pentose_RI=1797	0.0751112	1.33076
Phenylalanine	-0.0235434	0.417124
Phosphoric acid	0.0773641	1.37068
polyol_RI=1291	-0.0191972	0.340121
Proline	-0.000775593	0.0137414
Putrescine	0.0608363	1.07785
Ribonic acid	-0.018546	0.328584
Serine	0.0647082	1.14645
Squalene	-0.0585524	1.03739
sterol_RI=3158	-0.0246757	0.437186
sterol_RI=3277	0.066299	1.17464
sterol_RI=3299	0.0228661	0.405124
sterol_RI=3310	0.0837399	1.48364
sterol_RI=3386	0.0192825	0.341634
sterol_RI=3398	0.0593829	1.0521
Stigmasterol	0.0501786	0.889027
Suberylglycine	-0.0692373	1.2267
Succinic acid	-0.0535175	0.948184
Sucrose	-0.0125494	0.22234
Threonic acid	0.0509853	0.903319
Threonine	0.0774508	1.37222
Tryptophan	0.0177174	0.313904
Tyrosine	0.0147895	0.26203
Urea	-0.036807	0.652119
Uridine	0.0762324	1.35063
Valine	0.0196736	0.348563
